# Supplementary figures and images for: Machine learning-aided band gap prediction of semiconductors with low concentration doping
Source: Royal Society of Chemistry journal article supplement (doi:10.1039/d3cp02431h), 2023-01-01

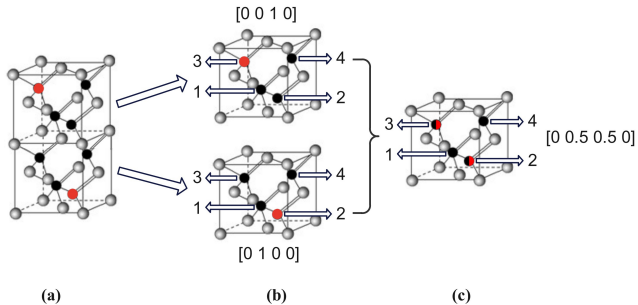

Supplement: d3cp02431h3.pdf [file d3cp02431h3.pdf]
